# Supplementary material for: A Computational Approach for the Discovery of Novel DNA Methyltransferase Inhibitors
Source: MDPI journal article supplement (doi:10.3390/cimb46040213), 2024-04-16
Supplement: s1 [file s1]

# A Computational Approach for the Discovery of Novel DNA Methyltransferase Inhibitors

Eftichia Kritsi \*, Paris Christodoulou, Thalia Tsiaka, Panagiotis Georgiadis and Maria Zervou \*

Institute of Chemical Biology, National Hellenic Research Foundation, 48 Vassileos Constantinou Avenue, 11635 Athens, Greece; pchristodoulou@eie.gr (P.C.); thtsiaka@eie.gr (T.T.); panosg@eie.gr (P.G.)

\* Correspondence: ekritsi@eie.gr (E.K.); mzervou@eie.gr (M.Z.)

**Table S1:** Chemical structures and class of the training set compounds

| Structure                                                                           | Name         | Class                                                                                                                                                                                |
|-------------------------------------------------------------------------------------|--------------|--------------------------------------------------------------------------------------------------------------------------------------------------------------------------------------|
| 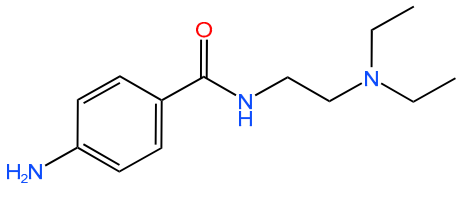   | Procainamide | DNMT1 (IC <sub>50</sub> = 300 uM) inhibitor                                                                                                                                          |
|  | Bobcat339    | TET1 (IC <sub>50</sub> = 33 uM) & TET2 (IC <sub>50</sub> = 73 uM) Inhibitor                                                                                                          |
|  | CM272        | DNMT1 inhibitor (IC <sub>50</sub> = 382 nM)                                                                                                                                          |
|  | SGI-1027     | DNMT1 (IC <sub>50</sub> = 12.5 uM) & DNMT3A (IC <sub>50</sub> = 8 uM) & DNMT3B (IC <sub>50</sub> = 7.5 uM) inhibitor                                                                 |
|  | Thioguanine  | DNMT1 inhibitor (inhibits DNMT1 activity through ubiquitin-targeted degradation, used in the treatment of acute lymphoblastic leukemia, autoimmune disorders (e.g., Crohn's disease, |

|                                                                                   |            |                                                       |
|-----------------------------------------------------------------------------------|------------|-------------------------------------------------------|
|                                                                                   |            | rheumatoid arthritis) and organ transplant recipients |
| 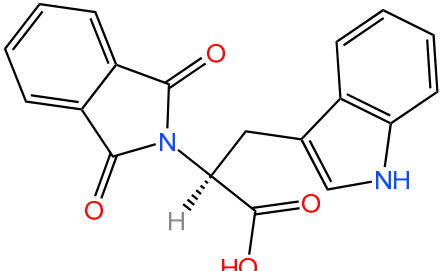 | RG108      | DNMT (IC <sub>50</sub> = 115 nM) inhibitor            |
|  | Decitabine | DNMT (IC <sub>50</sub> = 30 nM) inhibitor             |

<sup>1</sup> All activity values are retrieved from ChEMBL database (<https://www.ebi.ac.uk/chembl/>) and Selleck Chem (<https://www.selleckchem.com>)

**Table S2:** Chemical structures and class of the test set compounds

| Structure                                                                           | Name                      | Class           |
|-------------------------------------------------------------------------------------|---------------------------|-----------------|
| 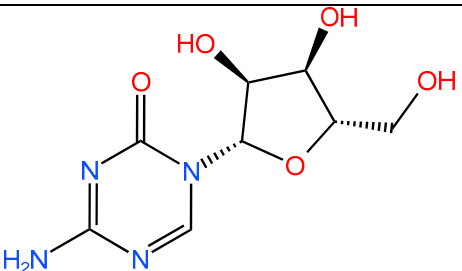 | Azacitidine               | DNMT1 inhibitor |
|  | Zebularine                | DNMT inhibitor  |
|  | 2'-Deoxy-5-Fluorocytidine | DNMT inhibitor  |

|                                                                                    |                              |                          |
|------------------------------------------------------------------------------------|------------------------------|--------------------------|
| 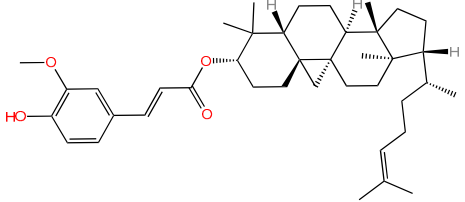  | Gamma-Oryzanol               | DNMT1 & DNMT3A inhibitor |
|   | (-)-Epigallocatechin gallate | DNMT1 & HDAC1 inhibitor  |
|  | $\beta$ -thujaplicin         | DNMT1 inhibitor          |

**Table S3:** Predicted physicochemical parameters of epigenetic drugs.

| Compounds    | AlogP <sup>1</sup> | MW <sup>2</sup> | HBA <sup>3</sup> | HBD <sup>4</sup> | RB <sup>5</sup> | PSA <sup>6</sup> |
|--------------|--------------------|-----------------|------------------|------------------|-----------------|------------------|
| Decitabine   | -0.5171            | 228.2053        | 6                | 3                | 2               | 123.5            |
| Azacitidine  | -1.2834            | 244.2047        | 7                | 4                | 2               | 143.7            |
| Procainamide | 1.1278             | 235.3253        | 1                | 2                | 6               | 58.36            |
| Hydralazine  | 0.6187             | 160.1759        | 2                | 2                | 1               | 63.83            |
| Romidepsin   | 1.6898             | 540.6958        | 6                | 4                | 2               | 193.3            |
| Panobinostat | 2.6833             | 349.4262        | 2                | 3                | 7               | 77.15            |
| Belinostat   | 1.6683             | 318.3477        | 4                | 3                | 5               | 103.9            |
| Vorinostat   | 1.9802             | 264.3202        | 3                | 3                | 8               | 78.43            |

<sup>1</sup> AlogP: lipophilicity, <sup>2</sup> MW: Molecular Weight, <sup>3</sup> HBA: Number of Hydrogen bond-Acceptors, <sup>4</sup> HBD: Number of Hydrogen bond-Donors, <sup>5</sup> RB: Rotatable Bonds and <sup>6</sup> PSA: Polar Surface Area

**Table S4:** Docking scores and interaction pattern of the most promising compounds.

| Compounds                      | Docking score (kcal·mol <sup>-1</sup> ) |          |        | Interaction pattern                                                                                         |                  |               |
|--------------------------------|-----------------------------------------|----------|--------|-------------------------------------------------------------------------------------------------------------|------------------|---------------|
|                                | Glide-SP                                | Glide-XP | IFD    | Glide-SP                                                                                                    | Glide-XP         | IFD           |
| Sinefungin (crystal structure) | -10.60                                  | -10.20   | -11.93 | HB Phe1145, HB, Leu1151, HB Ile1167, HB Glu1168, HB Met1169, HB Asp1190, HB Cys1191, HB Asn1578, HB Val1580 |                  |               |
| 1                              | -8.99                                   | -9.68    | -11.63 | WB Asp1143                                                                                                  | pi-pi/HB Phe1145 | HB/WB Asp1143 |

|                       |       |        |        |                                                                                                                               |                                                                                                                              |                                                                                                                                    |
|-----------------------|-------|--------|--------|-------------------------------------------------------------------------------------------------------------------------------|------------------------------------------------------------------------------------------------------------------------------|------------------------------------------------------------------------------------------------------------------------------------|
|                       |       |        |        | HB/WB<br><b>Phe1145</b><br>HB <b>Met1169</b><br>WB <b>Asn1578</b><br>HB <b>Val1580</b>                                        | WB Cys1148<br>HB Gly1149<br>HB Gly1150<br>Leu1151<br>HB <b>Met1169</b><br>WB <b>Asn1578</b>                                  | HB/WB<br><b>Phe1145</b><br>HB Gly1150<br>HB <b>Cys1191</b><br>WB <b>Asn1578</b><br>HB <b>Val1580</b>                               |
| 2                     | -7.69 | -10.44 | -9.41  | HB Glu698<br>HB <b>Glu1168</b><br>HB <b>Asp1190</b><br>WB <b>Asn1578</b>                                                      | HB/pi-pi<br><b>Phe1145</b><br>HB <b>Glu1168</b><br>HB <b>Asp1190</b><br>HB Gly1223                                           | HB Glu698<br>HB Ala699<br>pi-pi <b>Phe1145</b><br>WB Trp1170<br>HB <b>Cys1191</b><br>HB Gly1223<br>HB Gln1227<br>WB <b>Asn1578</b> |
| 3                     | -7.80 | -11.32 | -9.82  | HB Glu698<br>HB <b>Glu1168</b><br>HB <b>Asp1190</b><br>HB Gln1227<br>WB <b>Asn1578</b>                                        | HB Glu698<br>HB <b>Glu1168</b><br>HB <b>Asp1190</b><br>WB <b>Asn1578</b>                                                     | HB <b>Ile1167</b><br>HB <b>Glu1168</b><br>HB <b>Asp1190</b><br>HB Gln1227<br>HB Arg1574<br>WB <b>Asn1578</b>                       |
| 4                     | -7.96 | -9.93  | -8.15  | HB <b>Glu1168</b><br>HB <b>Met1169</b><br>HB <b>Asp1190</b><br>WB <b>Asn1578</b>                                              | HB <b>Glu1168</b><br>HB <b>Met1169</b><br>HB <b>Asp1190</b><br>WB <b>Asn1578</b>                                             | HB Ala699<br>HB Asn700<br>HB <b>Phe1145</b><br>HB Glu1266<br>HB Arg1312<br>HB <b>Asn1578</b>                                       |
| 5                     | -8.45 | -9.78  | -10.73 | HB Ser1146<br>HB Gly1150<br>HB <b>Leu1151</b><br>pi-pi Trp1170<br>HB Glu1266<br>HB <b>Val1580</b>                             | HB/pi-pi<br><b>Phe1145</b><br>HB Ser1146<br>WB Cys1148<br>HB Gly1150<br>HB <b>Asp1190</b><br>HB Glu1266<br>HB <b>Val1580</b> | HB Asn700<br>HB/WB<br><b>Phe1145</b><br>HB <b>Cys1190</b><br>HB Glu1266<br>HB Arg1312<br>HB <b>Asn1578</b>                         |
| 1 (COO <sup>-</sup> ) | -7.92 | -4.02  | -9.33  | pi-pi <b>Phe1145</b><br>WB Cys1148<br>HB Gly1149<br>HB Gly1150<br>HB <b>Met1169</b><br>WB <b>Asn1578</b><br>HB <b>Val1580</b> | WB Cys1148<br>HB Gly1149<br>HB Gly1150<br>HB <b>Leu1151</b><br>HB <b>Met1169</b><br>WB <b>Asn1578</b>                        | HB Asn700,<br>HB/WB<br><b>Phe1145</b><br>WB Cys1148<br>HB Gly1149<br>HB Gly1150<br>HB <b>Leu1151</b><br>WB <b>1578</b>             |
| 5 (COO <sup>-</sup> ) | -4.05 | -2.24  | -7.50  | WB Cys1148<br>pi-pi Trp1170<br>HB <b>Val1580</b>                                                                              | pi-pi <b>Phe1145</b><br>WB Cys1148<br>HB <b>Asp1190</b><br>SB Arg1310<br>WB <b>Asn1578</b>                                   | SB Lys629<br>pi-pi <b>Phe1145</b><br>HB <b>Glu1168</b><br>HB Gln1227                                                               |

WB: water bridge, HB: hydrogen bond, pi-pi: pi-pi interactions.

**Table S5:** Predicted ADMET properties of the most promising compounds, using ADMETlab 2.0 open source software.

| Compound | Physicochemical   |                 |                  |                  |                 |                   |                   | Medicinal Chemistry        |                          |                        | Absorption                        |                                 |                   | Distribution      |                   |
|----------|-------------------|-----------------|------------------|------------------|-----------------|-------------------|-------------------|----------------------------|--------------------------|------------------------|-----------------------------------|---------------------------------|-------------------|-------------------|-------------------|
|          | logP <sup>1</sup> | MW <sup>2</sup> | HBA <sup>3</sup> | HBD <sup>4</sup> | RB <sup>5</sup> | TPSA <sup>6</sup> | logS <sup>7</sup> | Lipinski rule <sup>8</sup> | Pfizer rule <sup>9</sup> | GSK rule <sup>10</sup> | Caco-2 permeability <sup>11</sup> | MDCK permeability <sup>12</sup> | HIA <sup>13</sup> | PPB <sup>14</sup> | BBB <sup>15</sup> |
| 1        | 0.623             | 484.15          | 11               | 3                | 13              | 153.4             | -3.107            | ●                          | ●                        | ●                      | ●                                 | ●                               | ●                 | ●                 | ●                 |
| 2        | 0.509             | 436.14          | 10               | 7                | 7               | 177.14            | -2.21             | ●                          | ●                        | ●                      | ●                                 | ●                               | ●                 | ●                 | ●                 |
| 3        | 0.757             | 448.10          | 11               | 8                | 3               | 201.28            | -3.697            | ●                          | ●                        | ●                      | ●                                 | ●                               | ●                 | ●                 | ●                 |
| 4        | -0.285            | 328.08          | 9                | 5                | 2               | 145.91            | -1.508            | ●                          | ●                        | ●                      | ●                                 | ●                               | ●                 | ●                 | ●                 |
| 5        | 5.352             | 539.26          | 10               | 5                | 17              | 169.94            | -3.526            | ●                          | ●                        | ●                      | ●                                 | ●                               | ●                 | ●                 | ●                 |

<sup>1</sup> logP: The logarithm of the n-octanol/water distribution coefficient. The predicted logP of a compound is given as the logarithm of the molar concentration (log mol/L). Compounds in the range from 0 to 3 log mol/L will be considered proper, <sup>2</sup> MW: Molecular Weight (Optimal:100~600, based on Drug-Like Soft rule), <sup>3</sup> HBA: Number of Hydrogen bond-Acceptors (Optimal: 0~12, based on Drug-Like Soft rule), <sup>4</sup> HBD: Number of Hydrogen bond-Donors (Optimal: 0~7, based on Drug-Like Soft rule), <sup>5</sup> RB: Number of Rotatable Bonds (Optimal: 0~11, based on Drug-Like Soft rule), <sup>6</sup> TPSA: Topological Polar Surface Area (Optimal:0~140, based on Veber rule), <sup>7</sup> logS: The logarithm of aqueous solubility value. The predicted solubility of a compound is given as the logarithm of the molar concentration (log mol/L). Compounds in the range from -4 to 0.5 log mol/L will be considered proper, <sup>8</sup> Lipinski rule: Empirical decision: <2 violations : excellent (green) ; ≥2 violations: poor (red) absorption or permeability is possible, <sup>9</sup> Pfizer rule: Compounds with a high log P (>3) and low TPSA (<75) are likely to be toxic. Empirical decision: two conditions satisfied: poor (red); otherwise: excellent (green), <sup>10</sup> GSK rule: Compounds satisfying the GSK rule may have a more favorable ADMET profile. Empirical decision: 0 violations: excellent (green); otherwise: poor (red), <sup>11</sup> Caco-2 permeability: The predicted Caco-2 permeability of a given compound is given as the log cm/s. A compound is considered to have a proper Caco-2 permeability if it has predicted value >-5.15log cm/s. Empirical decision: > -5.15: excellent (green); otherwise: poor (red), <sup>12</sup> MDCK permeability: Empirical decision: >2 x 10<sup>-6</sup> cm/s: excellent (green), otherwise: poor (red), <sup>13</sup> HIA: A molecule with an absorbance of less than 30% is considered to be poorly absorbed. Accordingly, molecules with a HIA >30% were classified as HIA- (Category 0), while molecules with a HIA < 30% were classified as HIA+(Category 1). The output value is the probability of being HIA+, within the range of 0 to 1. Empirical decision: 0-0.3: excellent (green); 0.3-0.7: medium (yellow); 0.7-1.0(++): poor (red), <sup>14</sup> PPB: A compound is considered to have a proper Plasma Protein Binding if it has predicted value < 90%, and drugs with high protein-bound may have a low therapeutic index. Empirical decision: ≤ 90%: excellent (green); otherwise: poor (red), <sup>15</sup> BBB: The unit of BBB penetration is cm/s. Molecules with logBB > -1 were classified as BBB+ (Category 1), while molecules with logBB ≤ -1 were classified as BBB- (Category 0). The output value is the probability of being BBB+, within the range of 0 to 1. Empirical decision: 0-0.3: excellent (green); 0.3-0.7: medium (yellow); 0.7-1.0(++): poor (red).

| Compound | Metabolism                     |                                 |                                |                                |                                | Excretion        |
|----------|--------------------------------|---------------------------------|--------------------------------|--------------------------------|--------------------------------|------------------|
|          | CYP1A2 inhibitor <sup>16</sup> | CYP2C19 inhibitor <sup>17</sup> | CYP2C9 inhibitor <sup>18</sup> | CYP2D6 inhibitor <sup>19</sup> | CYP3A4 inhibitor <sup>20</sup> | CL <sup>21</sup> |
| 1        | 0.022                          | 0.087                           | 0.116                          | 0.012                          | 0.041                          | ●                |
| 2        | 0.392                          | 0.063                           | 0.055                          | 0.608                          | 0.192                          | ●                |
| 3        | 0.199                          | 0.020                           | 0.071                          | 0.028                          | 0.058                          | ●                |
| 4        | 0.057                          | 0.015                           | 0.004                          | 0.008                          | 0.016                          | ●                |
| 5        | 0.157                          | 0.061                           | 0.444                          | 0.076                          | 0.029                          | ●                |

<sup>16-20</sup> Based on the chemical nature of biotransformation, the process of drug metabolism reactions can be divided into two broad categories: phase I (oxidative reactions) and phase II (conjugative reactions). The human cytochrome P450 family (phase I enzymes) contains 57 isozymes and these isozymes metabolize approximately two-thirds of known drugs in human with 80% of this attribute to five isozymes—1A2, 3A4, 2C9, 2C19 and 2D6. Most of these CYPs responsible for phase I reactions are concentrated in the liver. Category 0: Non-inhibitor; Category 1: inhibitor. The output value is the probability of being inhibitor, within the range of 0 to 1, <sup>21</sup> CL: Clearance is an important pharmacokinetic parameter that defines, together with the volume of distribution, the half-life, and thus the frequency of dosing of a drug. The unit of predicted CL penetration is ml/min/kg. >15 ml/min/kg: high clearance; 5-15 ml/min/kg: moderate clearance; <5 ml/min/kg: low clearance. Empirical decision: ≥ 5: excellent (green); < 5: poor (red).

| Compound | Toxicity                    |                                  |                               |                              |                                    |                         |                         |                      |                       |
|----------|-----------------------------|----------------------------------|-------------------------------|------------------------------|------------------------------------|-------------------------|-------------------------|----------------------|-----------------------|
|          | hERG blockers <sup>22</sup> | Skin sensitization <sup>23</sup> | Carcinogenicity <sup>24</sup> | Eye irritation <sup>25</sup> | Respiratory toxicity <sup>26</sup> | NR-AR LBD <sup>27</sup> | NR-ER LBD <sup>28</sup> | NR-AhR <sup>29</sup> | NR-PPAR <sup>30</sup> |
| 1        | ●                           | ●                                | ●                             | ●                            | ●                                  | ●                       | ●                       | ●                    | ●                     |
| 2        | ●                           | ●                                | ●                             | ●                            | ●                                  | ●                       | ●                       | ●                    | ●                     |
| 3        | ●                           | ●                                | ●                             | ●                            | ●                                  | ●                       | ●                       | ●                    | ●                     |
| 4        | ●                           | ●                                | ●                             | ●                            | ●                                  | ●                       | ●                       | ●                    | ●                     |
| 5        | ●                           | ●                                | ●                             | ●                            | ●                                  | ●                       | ●                       | ●                    | ●                     |

<sup>22</sup> hERG blockers: Molecules with IC<sub>50</sub> more than 10 μM or less than 50% inhibition at 10 μM were classified as hERG - (Category 0), while molecules with IC<sub>50</sub> less than 10 μM or more than 50% inhibition at 10 μM were classified as hERG+ (Category 1). The output value is the probability of being hERG+, within the range of 0 to 1. Empirical decision: 0-0.3: excellent (green); 0.3-0.7: medium (yellow); 0.7-1.0(++): poor (red), <sup>23</sup> Skin sensitizations: Category 1: Sensitizer; Category 0: Non-sensitizer. The output value is the probability of being toxic, within the range of 0 to 1. Empirical decision: 0-0.3: excellent (green); 0.3-0.7: medium (yellow); 0.7-1.0(++): poor (red), <sup>24</sup> Carcinogenicity: Category 1: carcinogens; Category 0: non-carcinogens. Chemicals are labelled as active (carcinogens) or inactive (non-carcinogens) according to their TD<sub>50</sub> values. The output value is the

probability of being toxic, within the range of 0 to 1. Empirical decision: 0-0.3: excellent (green); 0.3-0.7: medium (yellow); 0.7-1.0(++): poor (red), <sup>25</sup> Eye irritation: Category 1: irritants chemicals; Category 0: non-irritants chemicals. The output value is the probability of being toxic, within the range of 0 to 1. Empirical decision: 0-0.3: excellent (green); 0.3-0.7: medium (yellow); 0.7-1.0(++): poor (red), <sup>26</sup> Respiratory toxicity: Category 1: respiratory toxicants; Category 0: non-respiratory toxicants. The output value is the probability of being toxic, within the range of 0 to 1. Empirical decision: 0-0.3: excellent (green); 0.3-0.7: medium (yellow); 0.7-1.0(++): poor (red), <sup>27</sup> NR-AR LBD: Androgen receptor (AR), a nuclear hormone receptor, plays a critical role in AR-dependent prostate cancer and other androgen related diseases. Endocrine disrupting chemicals (EDCs) and their interactions with steroid hormone receptors like AR may cause disruption of normal endocrine function as well as interfere with metabolic homeostasis, reproduction, developmental and behavioral functions. Category 1: actives; Category 0: inactives. Molecules that labeled 1 in this bioassay may bind to the LBD of androgen receptor. The output value is the probability of being actives, within the range of 0 to 1. Empirical decision: 0-0.3: excellent (green); 0.3-0.7: medium (yellow); 0.7-1.0(++): poor (red), <sup>29</sup> NR-AhR: The Aryl hydrocarbon Receptor (AhR), a member of the family of basic helix-loop-helix transcription factors, is crucial to adaptive responses to environmental changes. AhR mediates cellular responses to environmental pollutants such as aromatic hydrocarbons through induction of phase I and II enzymes but also interacts with other nuclear receptor signaling pathways. Category 1: actives; Category 0: inactives. Molecules that labeled 1 may activate the aryl hydrocarbon receptor signaling pathway. The output value is the probability of being actives, within the range of 0 to 1. Empirical decision: 0-0.3: excellent (green); 0.3-0.7: medium (yellow); 0.7-1.0(++): poor (red), <sup>30</sup> NR-PPAR $\gamma$ : The peroxisome proliferator-activated receptors (PPARs) are lipid-activated transcription factors of the nuclear receptor superfamily with three distinct subtypes namely PPAR alpha, PPAR delta (also called PPAR beta) and PPAR gamma (PPAR $\gamma$ ). All these subtypes heterodimerize with Retinoid X receptor (RXR) and these heterodimers regulate transcription of various genes. PPAR-gamma receptor (glitazone receptor) is involved in the regulation of glucose and lipid metabolism. Category 1: actives; Category 0: inactives. The output value is the probability of being actives within the range of 0 to 1. Empirical decision: 0-0.3: excellent (green); 0.3-0.7: medium (yellow); 0.7-1.0(++): poor (red).

**Table S6.** Binding energy (kcal · mol<sup>-1</sup>) and individual energy terms of *h*DNMT1-selected compounds complexes calculated, using Prime MM-GBSA.

| Compound   | $\Delta G_{\text{Bind}}^1$<br>(kcal·mol <sup>-1</sup> ) | $\Delta G_{\text{Coulomb}}^2$<br>(kcal·mol <sup>-1</sup> ) | $\Delta G_{\text{Hbond}}^3$<br>(kcal·mol <sup>-1</sup> ) | $\Delta G_{\text{Lipo}}^4$<br>(kcal·mol <sup>-1</sup> ) | $\Delta G_{\text{Solv}}^5$<br>(kcal·mol <sup>-1</sup> ) | $\Delta G_{\text{vdW}}^6$<br>(kcal·mol <sup>-1</sup> ) |
|------------|---------------------------------------------------------|------------------------------------------------------------|----------------------------------------------------------|---------------------------------------------------------|---------------------------------------------------------|--------------------------------------------------------|
| Sinefungin | -95.03                                                  | -48.58                                                     | -6.84                                                    | -23.47                                                  | 40.65                                                   | -62.04                                                 |
| 1          | -42.87                                                  | 13.86                                                      | -7.69                                                    | -35.67                                                  | -16.74                                                  | -12.42                                                 |
| 2          | -69.84                                                  | -31.35                                                     | -3.01                                                    | -35.86                                                  | 38.43                                                   | -43.57                                                 |
| 3          | -68.19                                                  | -27.10                                                     | -3.78                                                    | -34.58                                                  | 38.75                                                   | -44.56                                                 |
| 4          | -65.12                                                  | -22.50                                                     | -4.03                                                    | -36.47                                                  | 37.95                                                   | -44.56                                                 |
| 5          | -95.97                                                  | -48.93                                                     | -2.68                                                    | -51.80                                                  | 50.16                                                   | -59.11                                                 |

\* <sup>1</sup> $\Delta G_{\text{Bind}}$ : total energy, <sup>2</sup> $\Delta G_{\text{Coulomb}}$ : Coulomb energy, <sup>3</sup> $\Delta G_{\text{Hbond}}$ : Hydrogen-bonding correction energy, <sup>4</sup> $\Delta G_{\text{Lipo}}$ : Lipophilic energy, <sup>5</sup> $\Delta G_{\text{Solv}}$ : Generalized Born electrostatic solvation energy, <sup>6</sup> $\Delta G_{\text{vdW}}$ : Van der Waals energy

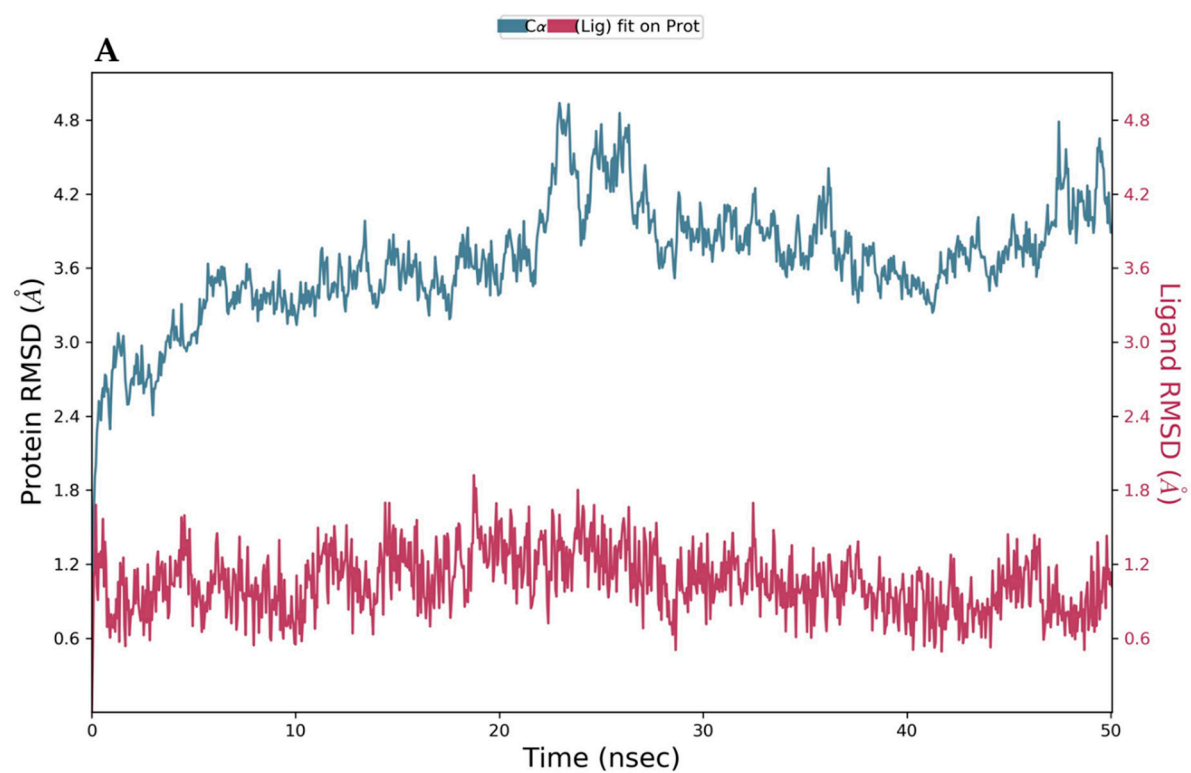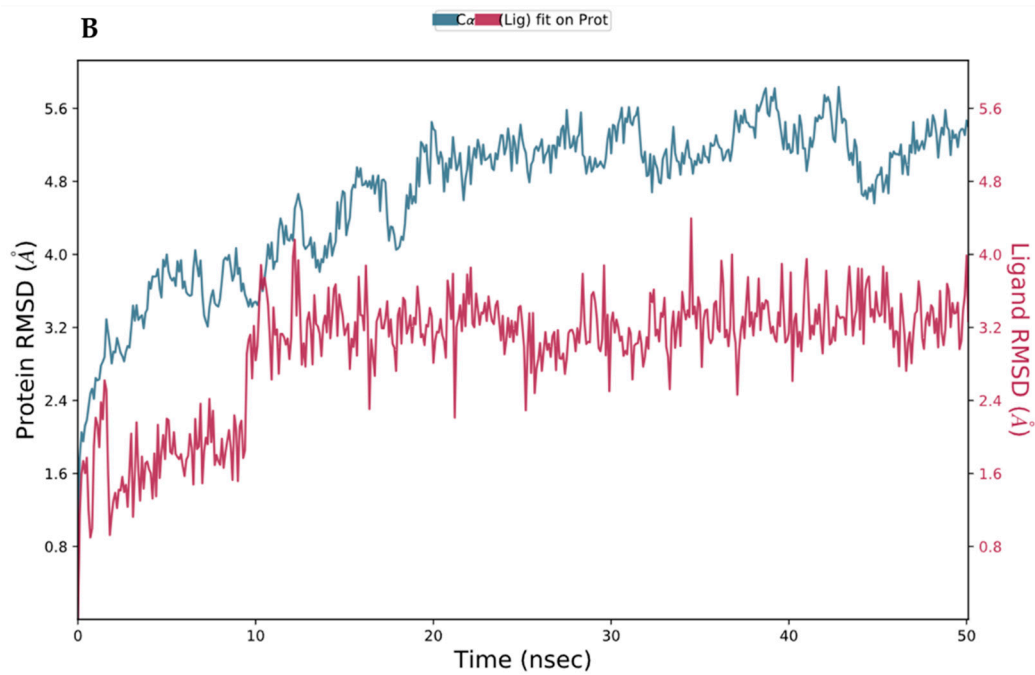

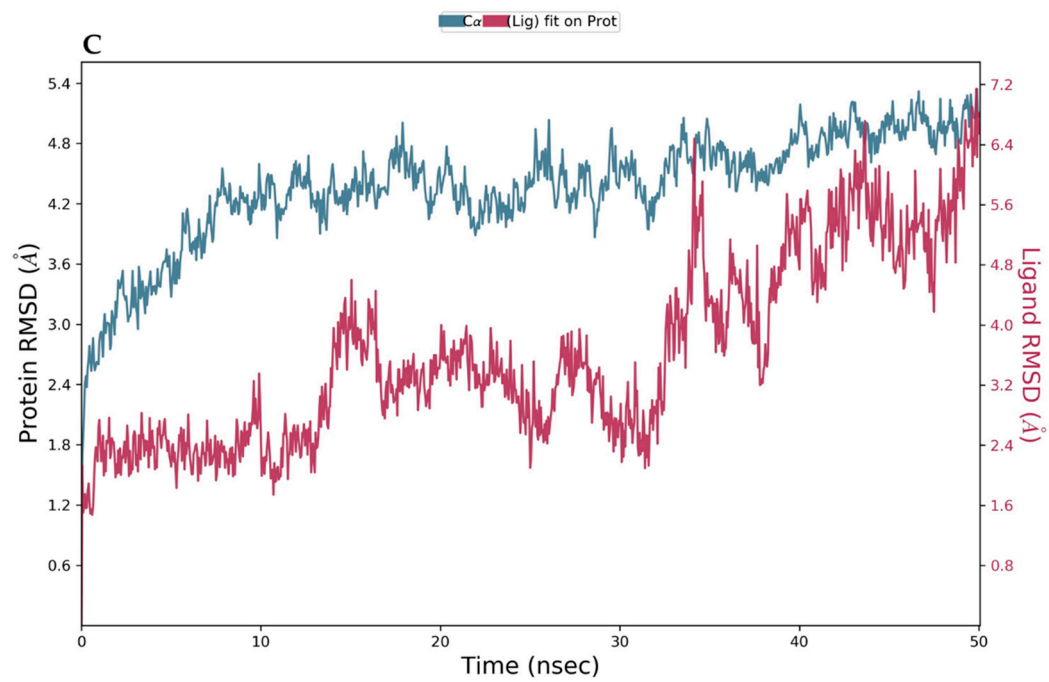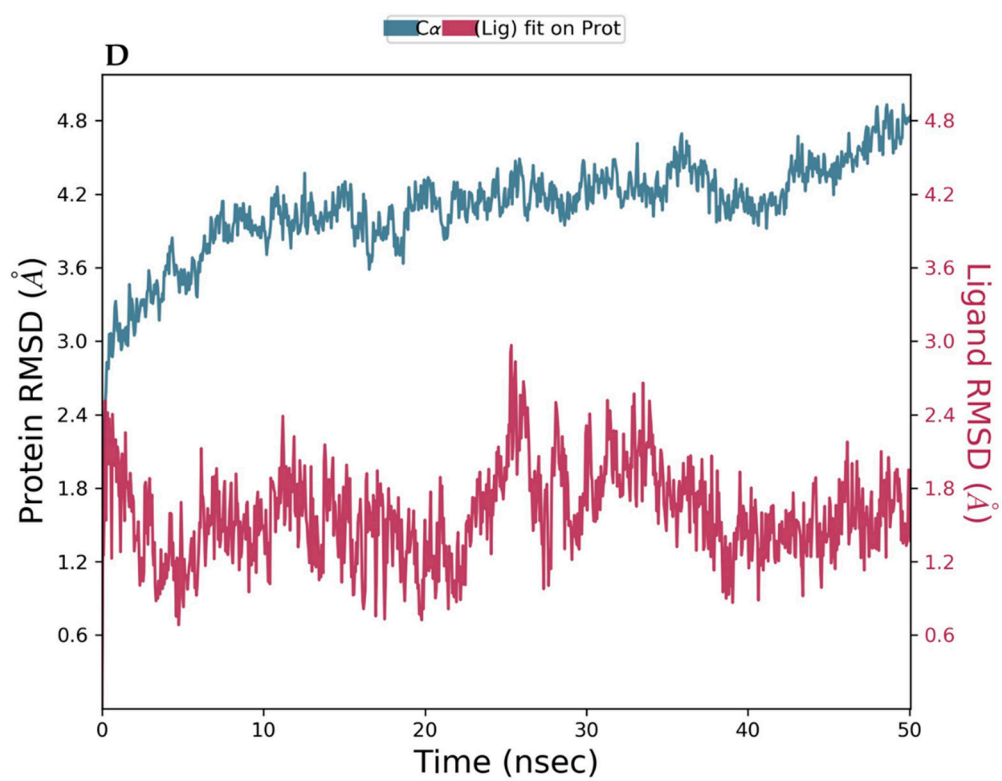

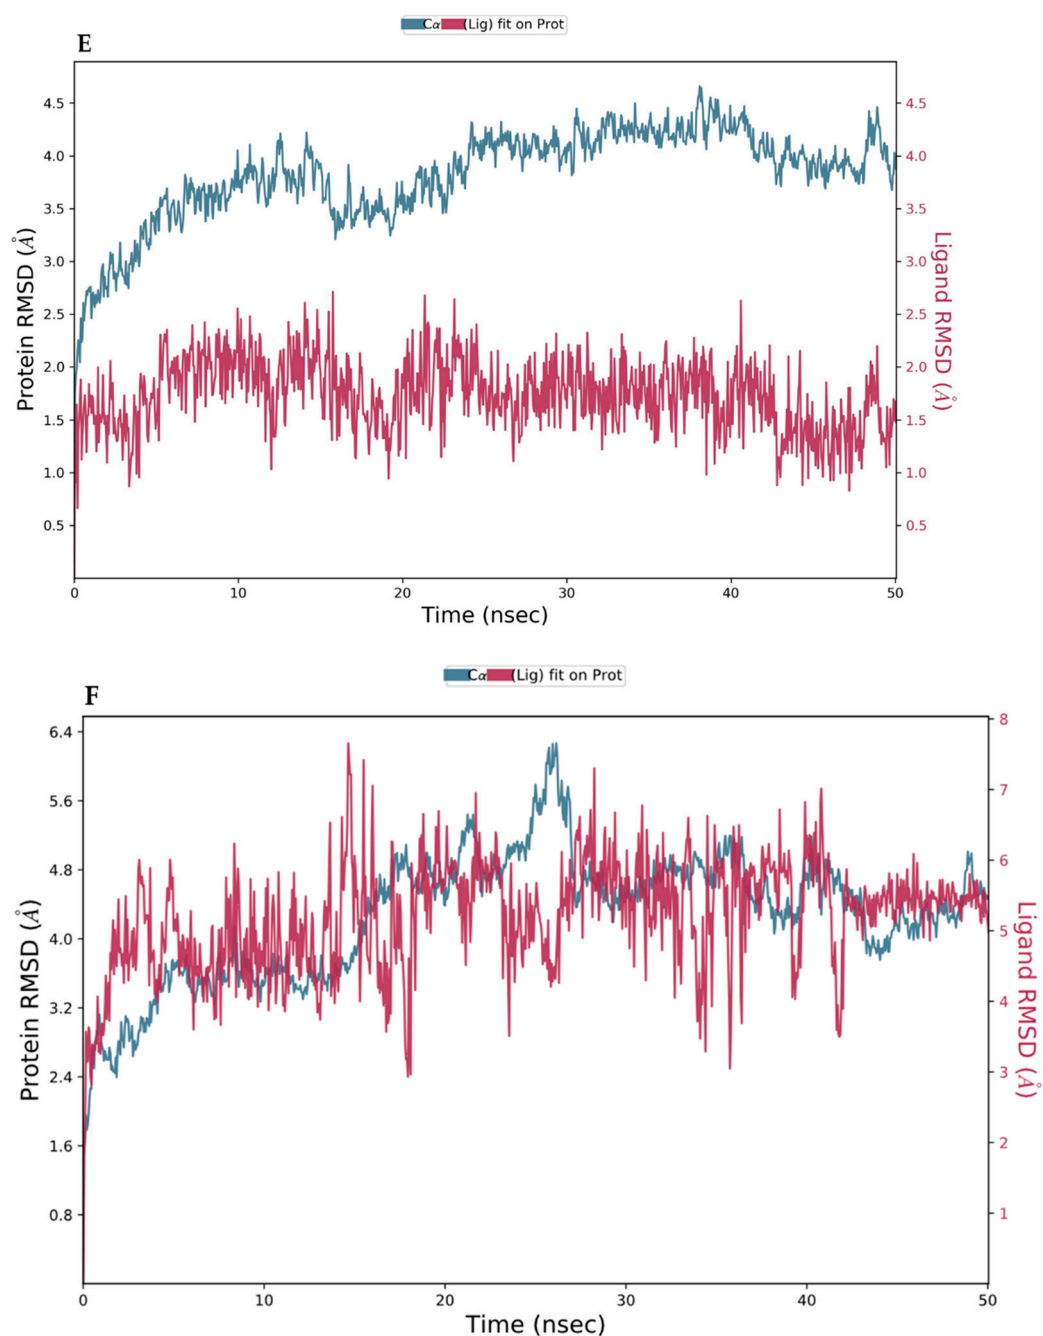

**Figure S1:** RMSD calculations (50 ns) for (A) all Ca enzyme atoms (blue) in *h*DNMT1-Sinefungin complex and for all atoms of Sinefungin (red), (B) all Ca enzyme atoms (blue) in *h*DNMT1-Compound 1 complex and for all atoms of Compound 1 (red), (C) all Ca enzyme atoms (blue) in *h*DNMT1-Compound 2 complex and for all atoms of Compound 2 (red), (D) all Ca enzyme atoms (blue) in *h*DNMT1-Compound 2 complex and for all atoms of Compound 3 (red), (E) all Ca enzyme atoms (blue) in *h*DNMT1-Compound 4 complex and for all atoms of Compound 4 (red), (F) all Ca enzyme atoms (blue) in *h*DNMT1-Compound 5 complex and for all atoms of Compound 5 (red).

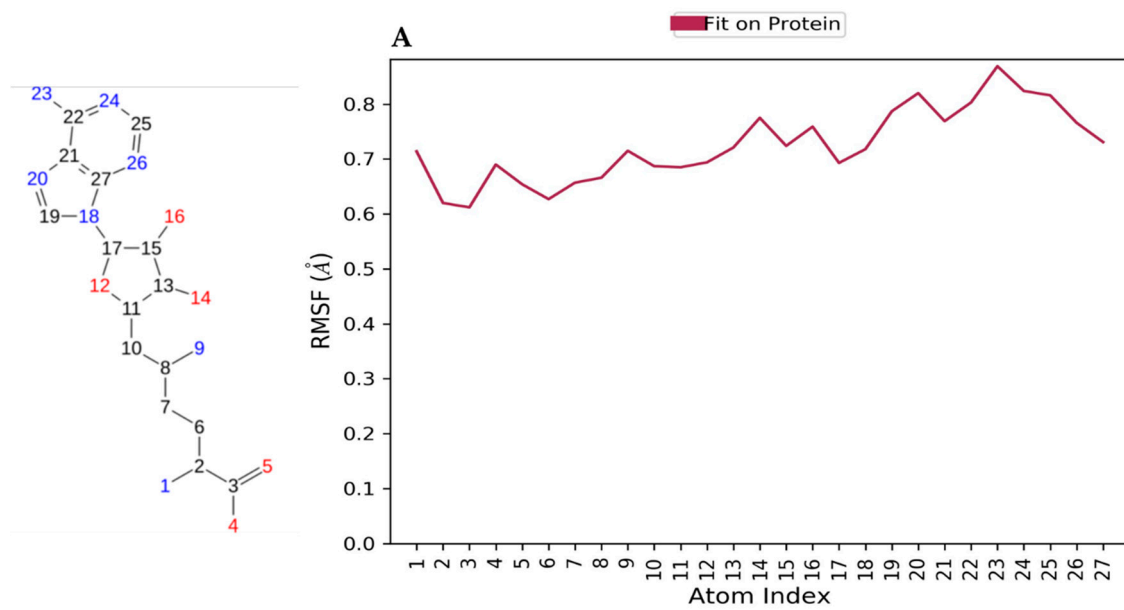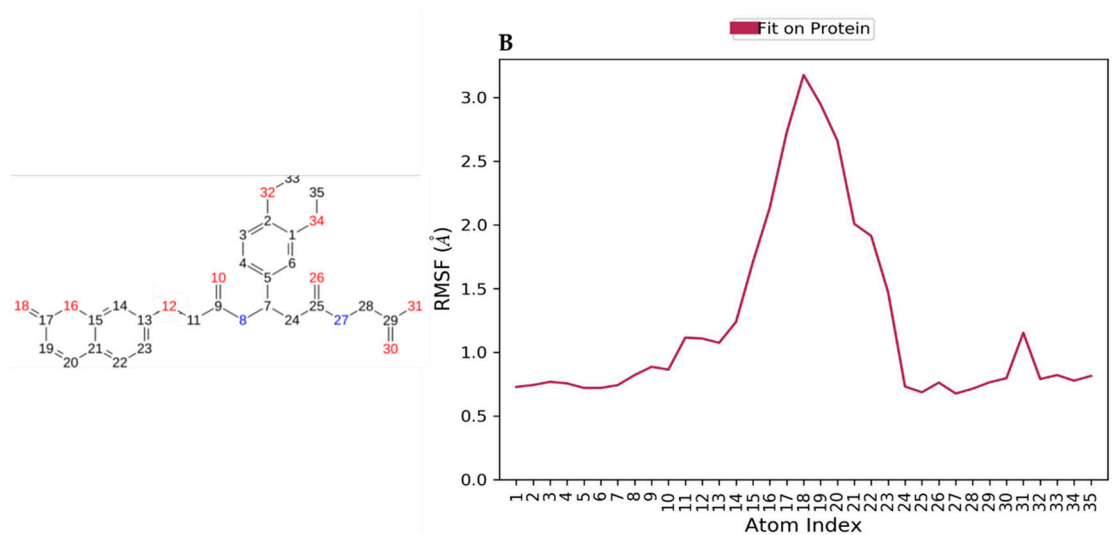

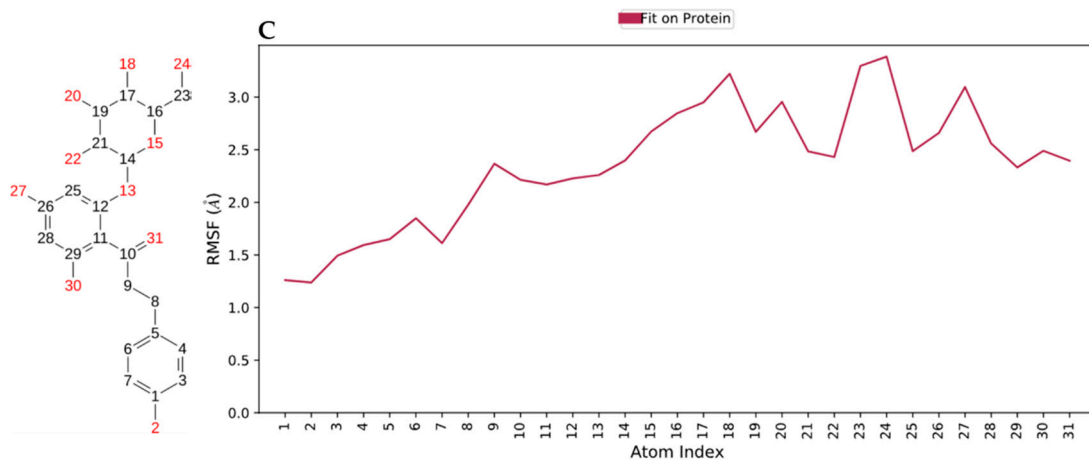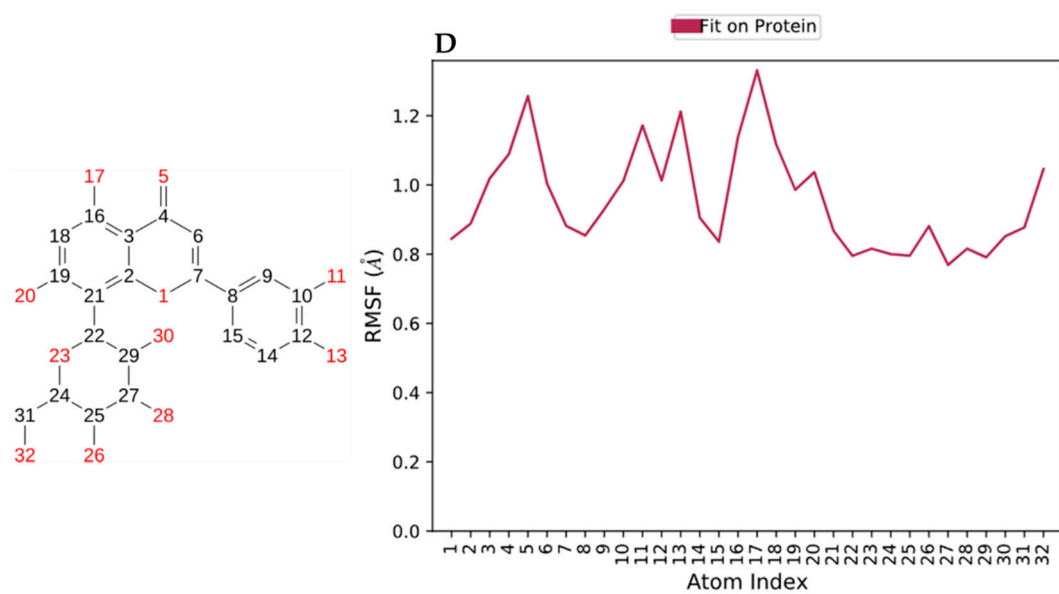

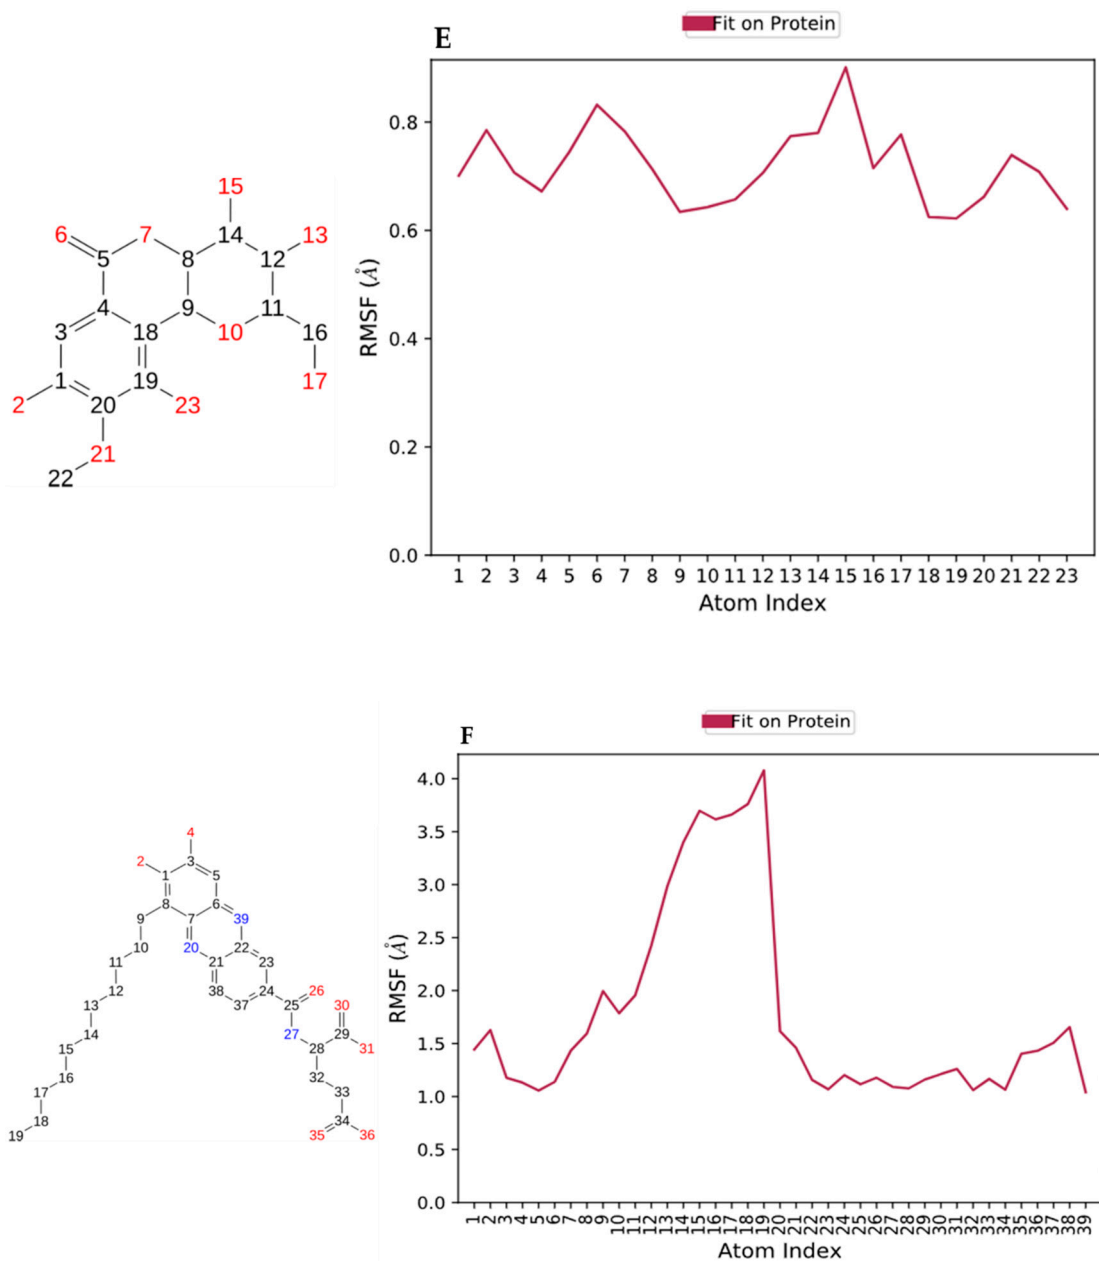

**Figure S2:** RMSF calculations of ligand atomic positions throughout molecular dynamics simulations (50ns) of (A) Sinefungin, (B) Compound 1, (C) Compound 2, (D) Compound 3, (E) Compound 4 and (F) Compound 5 in complex with *h*DNMT1.
